# Supplementary material for: Synergy as a rationale for phage therapy using phage cocktails
Source: PubMed Central journal article supplement (PMC4179555; doi:10.7717/peerj.590), 2014-09-25

**A. IJ2308**

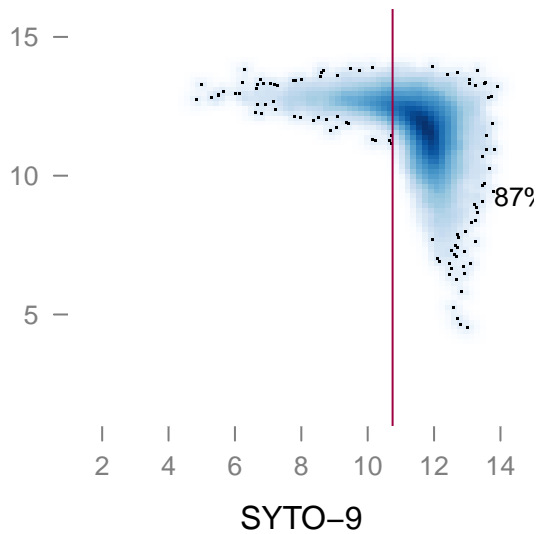

**B. J8-65**

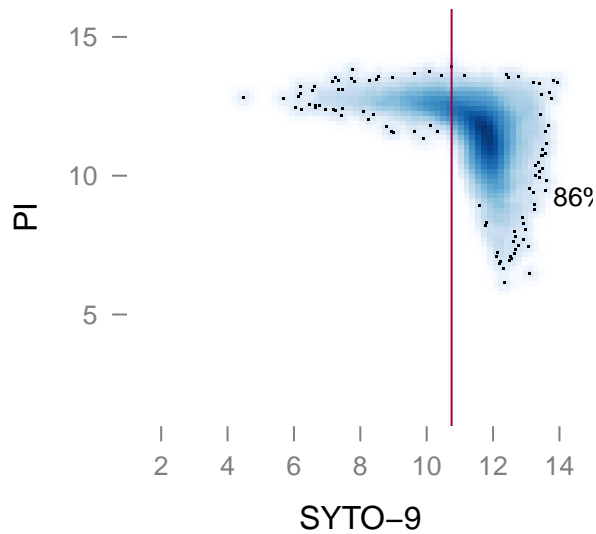

**C. T7-61**

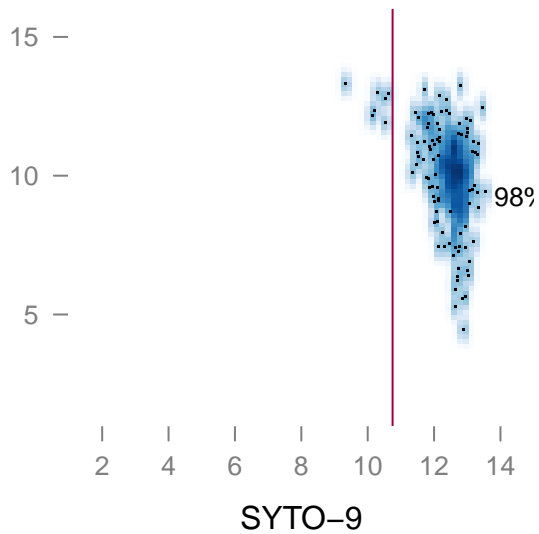

**D. J8-65 + T7-61**

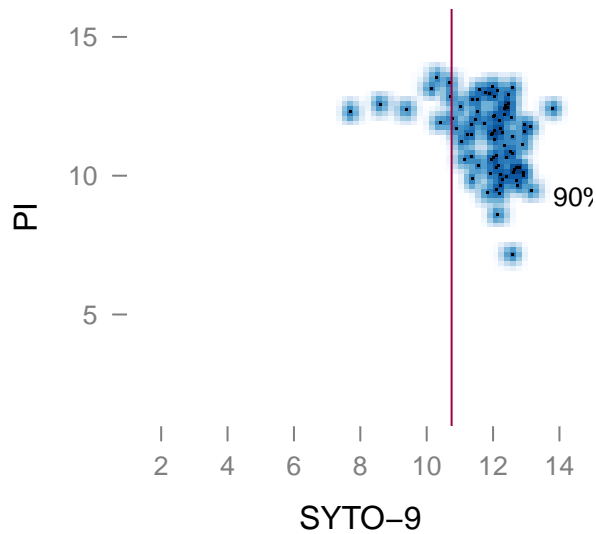

Supplement: peerj-02-590-s001.pdf [file peerj-02-590-s001.pdf]
